# Supplementary material for: Antitumor Activity of the Glutaminase Inhibitor CB-839 in Triple-Negative Breast Cancer
Source: Oxford University Press journal article supplement (doi:10.1158/1535-7163.mct-13-0870), 2014-02-13
Supplement: 15357163mct130870-sup-fig_1.pdf [file 15357163mct130870-sup-fig_1.pdf]

Gross et al., "Antitumor Activity of the Glutaminase Inhibitor CB-839 in TNBC"  
Supplementary Figure S1

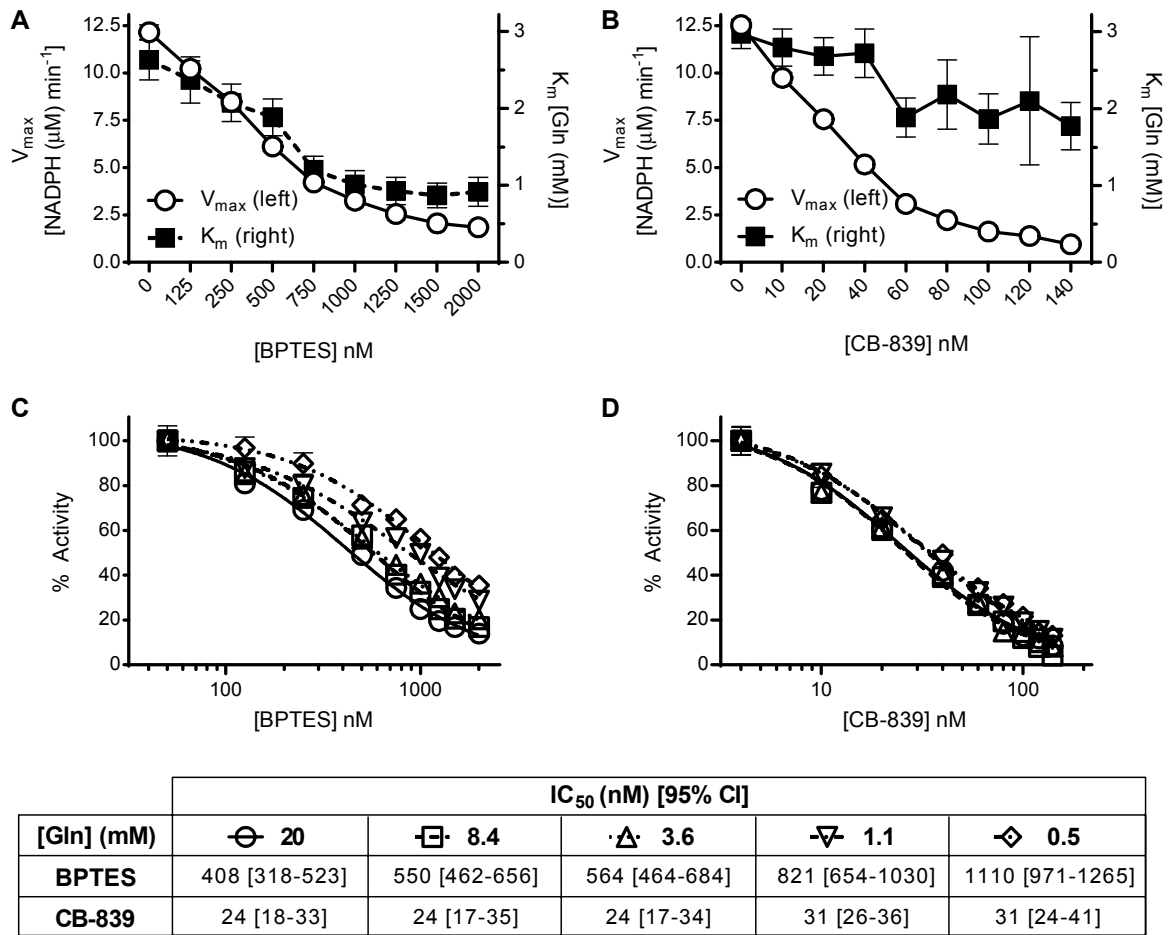

**Supplementary Figure S1. CB-839 is a non-competitive inhibitor of rHu-GAC.** A, glutaminase activity following a 1 hour incubation of BPTES with rHu-GAC measured at different glutamine concentrations. Lineweaver-Burke plots were generated by plotting the reciprocal of the initial velocity versus the reciprocal of the glutamine concentration at several compound concentrations (not shown).  $V_{max}$  and  $K_m$  values are plotted for different concentrations of BPTES. B, glutaminase activity following a 1 hour incubation of CB-839 with rHu-GAC measured at different glutamine concentrations as described in (A). C, dose response curves for BPTES following a 1 hour incubation with rHu-GAC at different glutamine concentrations. D, dose response curves for CB-839 following a 1 hour incubation with rHu-GAC at different glutamine concentrations. Each data point represents the mean and SEM from duplicate measurements. Results are representative of three independent experiments. The IC<sub>50</sub> values and 95% CI for (C) and (D) are listed.
