# Supplementary material for: Antitumor Activity of the Glutaminase Inhibitor CB-839 in Triple-Negative Breast Cancer
Source: Oxford University Press journal article supplement (doi:10.1158/1535-7163.mct-13-0870), 2014-02-13
Supplement: 15357163mct130870-sup-fig_3.pdf [file 15357163mct130870-sup-fig_3.pdf]

Gross et al., "Antitumor Activity of the Glutaminase Inhibitor CB-839 in TNBC"  
Supplementary Figure S3

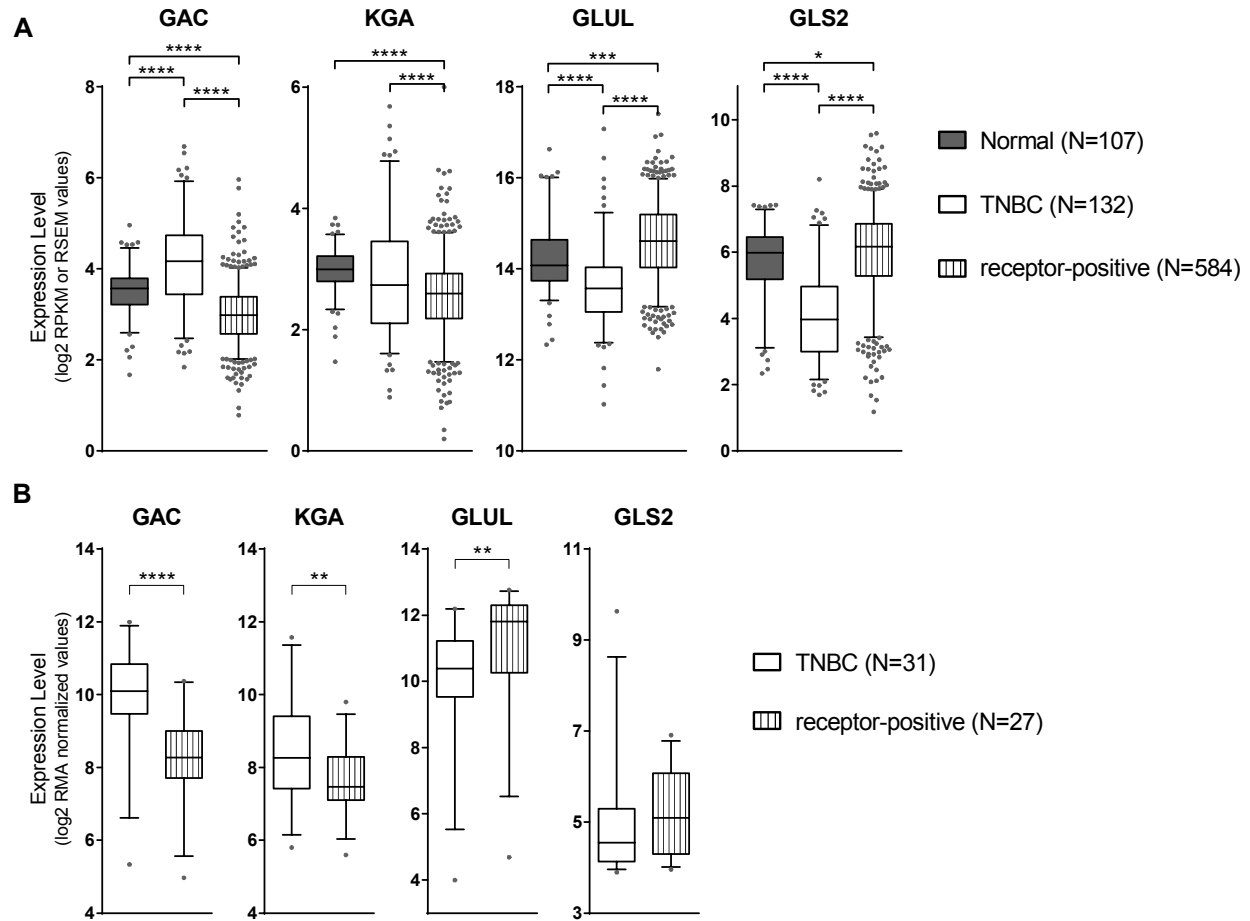

**Supplementary Figure S3. TNBC primary tumors and cell lines have elevated glutaminase (GAC) mRNA levels.** A, expression levels for *GAC*, *KGA*, *GLUL* and *GLS2* in normal breast tissue, TNBC tumors, and receptor-positive tumors from the TCGA breast invasive carcinoma dataset. The log<sub>2</sub> transformed expression levels for each gene are plotted; "whiskers" span the 5th to 95th percentile with data outside this range shown as individual data points. B, expression levels for *GAC*, *KGA*, *GLUL* and *GLS2* in TNBC and receptor-positive breast cancer cell lines from the CCLE dataset. log<sub>2</sub> transformed expression values are plotted as in (A). Statistical comparisons were performed by one-way ANOVA (A) or unpaired t-test (B): \* $P \leq 0.05$ , \*\* $P \leq 0.01$ , \*\*\* $P \leq 0.001$ , \*\*\*\*  $P \leq 0.0001$ .
