# Supplementary material for: Antitumor Activity of the Glutaminase Inhibitor CB-839 in Triple-Negative Breast Cancer
Source: Oxford University Press journal article supplement (doi:10.1158/1535-7163.mct-13-0870), 2014-02-13
Supplement: 15357163mct130870-sup-fig_4.pdf [file 15357163mct130870-sup-fig_4.pdf]

Gross et al., "Antitumor Activity of the Glutaminase Inhibitor CB-839 in TNBC"  
Supplementary Figure S4

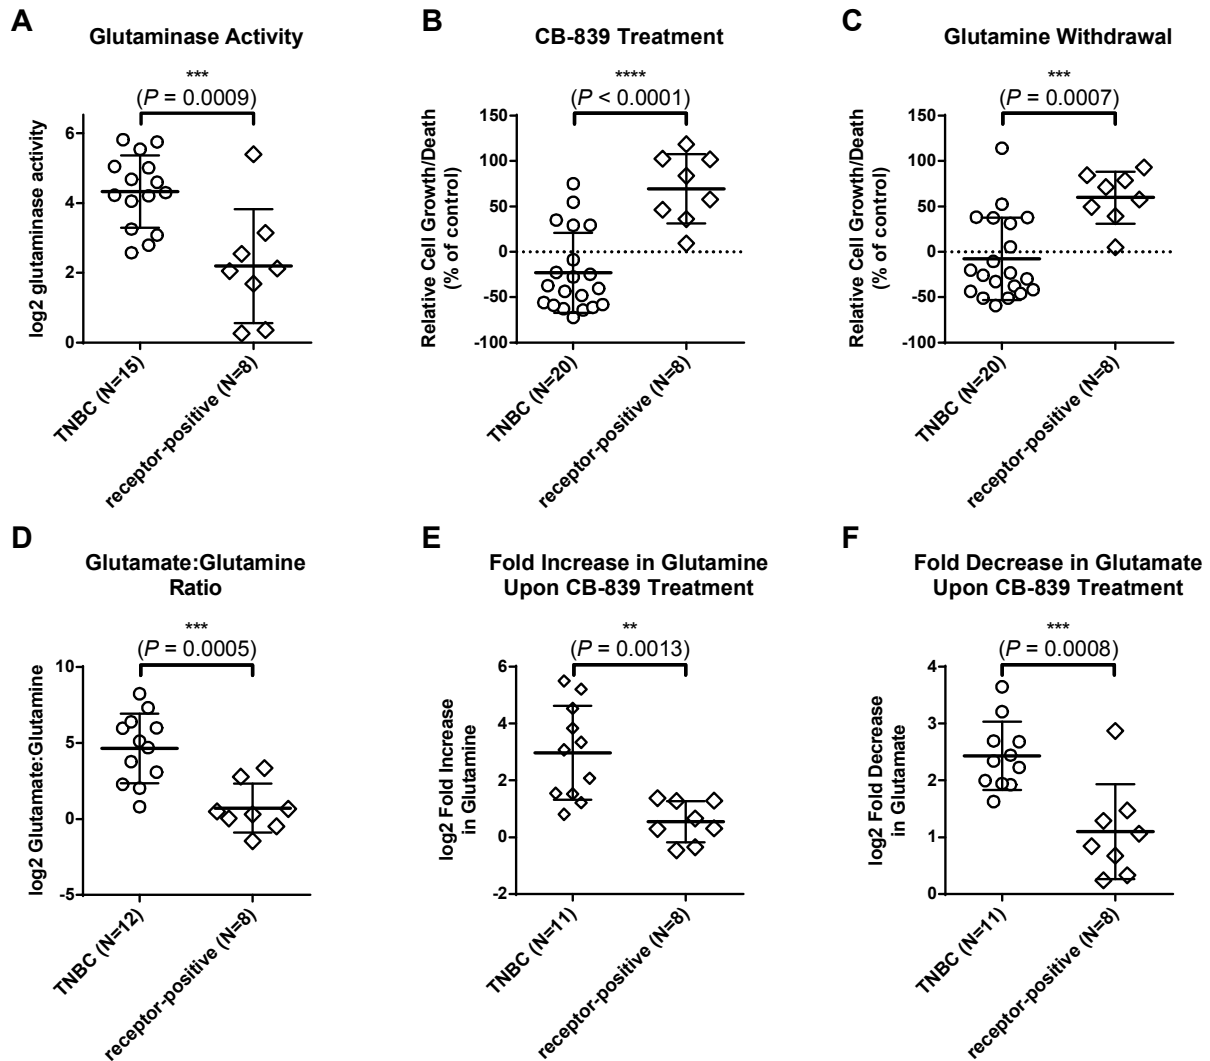

**Supplementary Figure S4. Markers of glutamine utilization are increased in TNBC cell lines relative to receptor-positive cell lines.** A, phosphate-activated glutaminase specific activity (log<sub>2</sub> transformed) measured in lysates from TNBC and receptor-positive breast cancer cell lines. B, extent of cell proliferation or cell loss following treatment of TNBC and receptor-positive breast cancer cell lines with 1  $\mu$ M CB-839 for 72 hours. C, extent of cell proliferation or cell loss for TNBC and receptor-positive breast cancer cell lines deprived of extracellular glutamine for 72 hours. D, baseline ratio of glutamate to glutamine (log<sub>2</sub> transformed) in TNBC and receptor-positive breast cancer cell lines. E, fold increase in intracellular glutamine (log<sub>2</sub> transformed) in TNBC and receptor-positive breast cancer cell lines treated with 1  $\mu$ M CB-839 for 4 hours. F, fold decrease in intracellular glutamate (log<sub>2</sub> transformed) in TNBC and receptor-positive breast cancer cell lines treated with 1  $\mu$ M CB-839 for 4 hours. Each datapoint represents one cell line; the horizontal bars denote the mean (large bar) and SD (smaller bars) for the two populations. Statistical analyses were performed by unpaired t-test: \*\* $P \leq 0.01$ , \*\*\* $P \leq 0.001$ , \*\*\*\* $P \leq 0.0001$ .
