# Supplementary material for: Antitumor Activity of the Glutaminase Inhibitor CB-839 in Triple-Negative Breast Cancer
Source: Oxford University Press journal article supplement (doi:10.1158/1535-7163.mct-13-0870), 2014-02-13
Supplement: 15357163mct130870-sup-fig_5.pdf [file 15357163mct130870-sup-fig_5.pdf]

Gross et al., "Antitumor Activity of the Glutaminase Inhibitor CB-839 in TNBC"  
Supplementary Figure S5

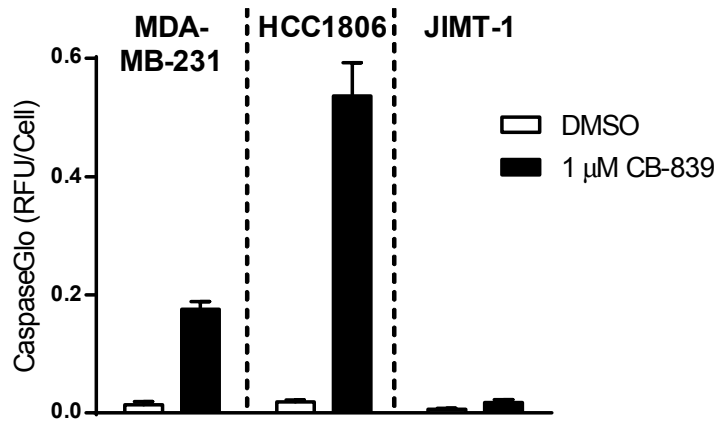

**Supplementary Figure S5: Induction of apoptotic cell death by CB-839.** Caspase 3/7 activation measured in MDA-MB-231, HCC1806 and JIMT-1 cells after treatment with DMSO or 1 μM CB-839 for 72 hours. A parallel plate was analyzed for cell number and the amount of caspase 3/7 activation per cell is plotted. The mean and SEM from duplicate measurements are shown.
