# Supplementary material for: Antitumor Activity of the Glutaminase Inhibitor CB-839 in Triple-Negative Breast Cancer
Source: Oxford University Press journal article supplement (doi:10.1158/1535-7163.mct-13-0870), 2014-02-13
Supplement: 15357163mct130870-sup-fig_6.pdf [file 15357163mct130870-sup-fig_6.pdf]

Gross et al., "Antitumor Activity of the Glutaminase Inhibitor CB-839 in TNBC"  
Supplementary Figure S6

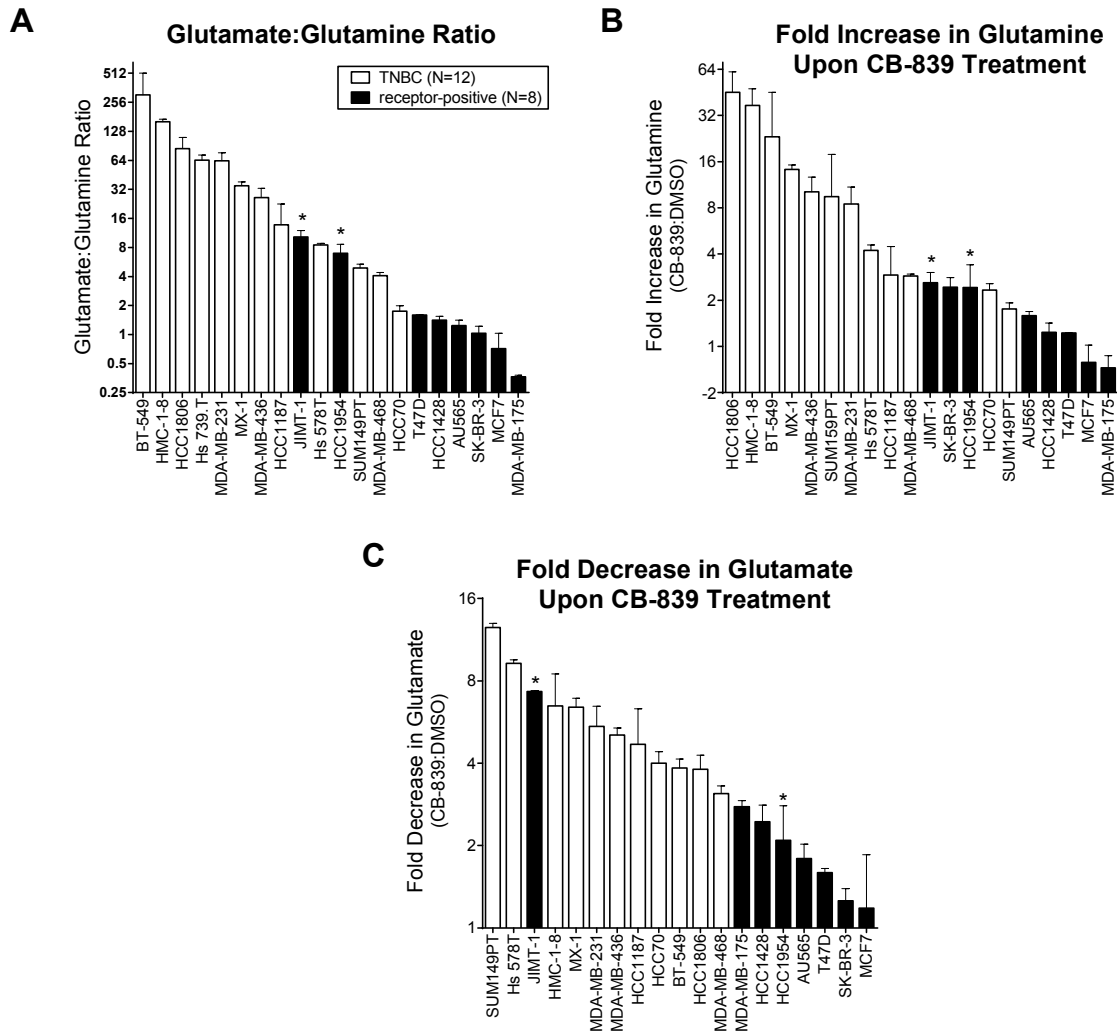

**Supplementary Figure S6: The basal glutamate to glutamine ratio and the fold change in glutamine and glutamate following CB-839 treatment is greater in TNBC cells than receptor-positive cell lines.** A, basal ratio of intracellular glutamate to glutamine (levels measured by LC/MS/MS) across a panel of TNBC and receptor-positive breast cancer cell lines. The glutamate to glutamine ratio (mean and SEM of duplicate measurements) for each cell line is graphed on a log2 scale in descending order. B, the fold increase in intracellular glutamine (measured by LC/MS/MS) across a panel of TNBC and receptor-positive breast cancer cell lines following treatment with 1  $\mu$ M CB-839 for 4 hours. The fold glutamine increase relative to DMSO control (mean and SEM of duplicate measurements) for each cell line is graphed on a log2 scale in descending order. C, the fold decrease in intracellular glutamate (measured by LC/MS/MS) across a panel of TNBC and receptor-positive breast cancer cell lines following treatment with 1  $\mu$ M CB-839 for 4 hours. The fold glutamate decrease relative to DMSO control (mean and SEM of duplicate measurements) for each cell line is graphed on a log2 scale in descending order. The basal-like ER-/HER2+ cell lines JIMT-1 and HCC1954 are annotated with asterisks (\*).
